# Supplementary material for: IL-17A and its homologs IL-25/IL-17E recruit the c-RAF/S6 kinase pathway and the generation of pro-oncogenic LMW-E in breast cancer cells
Source: PubMed Central journal article supplement (PMC4648389; doi:10.1038/srep11874), 2015-07-08
Supplement: srep11874-s1.pdf [file srep11874-s1.pdf]

## **IL-17A and its homologs IL-25/IL-17E recruit the c-RAF/S6 kinase pathway and the generation of pro-oncogenic LMW-E in breast cancer cells**

**Sarah Mombelli<sup>1,2,3,4</sup>, Stéphanie Cochaud<sup>1,2,5</sup>, Yacine Merrouche<sup>3,4</sup>, Christian Garbar<sup>3</sup>, Frank Antonicelli<sup>4</sup>, Emilie Laprevotte<sup>5,6</sup>, Gilles Alberici<sup>5</sup>, Nathalie Bonnefoy<sup>6</sup>, Jean-François Eliaou<sup>6,7</sup>, Jérémy Bastid<sup>5</sup>, Armand Bensussan<sup>1,2,\*</sup>, Jérôme Giustiniani<sup>3,4#</sup>.**

<sup>1</sup>Institut National de la Santé et de la Recherche Médicale (INSERM) U976, Hôpital Saint Louis, 75010 Paris, France

<sup>2</sup> Université Paris Diderot, Sorbonne Paris Cité, Laboratoire Immunologie Dermatologie & Oncologie, UMR-S 976, F-75475, Paris, France

<sup>3</sup>Institut Jean Godinot, Unicancer, F- 51726 Reims, France

<sup>4</sup>Université Reims-Champagne-Ardenne, DERM-I-C, EA7319, 51 rue Cognacq-Jay, 51095 Reims Cedex, France

<sup>5</sup>OREGA Biotech, F-69130 Ecully, France

<sup>6</sup>IRCM, Institut de Recherche en Cancérologie de Montpellier ; INSERM, U896 ; Université Montpellier 1 ; CRLC Val d'Aurelle Paul Lamarque, Montpellier, F-34298, France.

<sup>7</sup>Département d'Immunologie, Centre Hospitalier Régional Universitaire de Montpellier et Faculté de Médecine Université Montpellier 1, Montpellier, France.

#Contributed equally

\*Corresponding author: [armand.bensussan@inserm.fr](mailto:armand.bensussan@inserm.fr)

**Conflict of interest:** G.A., N.B., J-F.E. and A.B are cofounders and shareholders of OREGA Biotech. JB is employee of OREGA Biotech and S.M., S.C., Y.M., C.G., F.A., E.L. and J.G. declare no conflict of interest

**Supp Figure 1: IL-17E-induced resistance to Docetaxel is dependent of ERK1/2 activation.** BT20 cells were stimulated with recombinant IL-17E at 10ng/ml alone or in association with the MEK inhibitor U0126 at 10 $\mu$ M 24h before adding the drug. Cell death is measured after 7h of culture. Data shown are representative of 2 independent experiments.

**Supp Figure 2: IL-17E induces the phosphorylation of ERK1/2 and cell proliferation** (A) Western blot analysis of pThr202/pTyr204 Erk1/2 was performed on MDA-MB468 stimulated for 20 min with recombinant IL-17A or IL-17E at 10ng/ml alone. (B) Western blot analysis of pErk1/2 was performed on BT20 cells stimulated for 30 min with recombinant IL-17E at 10ng/ml alone or in association with the MEK inhibitor U0126 at 10 $\mu$ M 24h before adding the drug. The figure shows one representative experiment from two independent experiments.

(C) MCF7, T47D, and IJG-1731 breast cancer cell lines were cultured in complete medium supplemented with 20ng/ml of recombinant human IL-17A or IL-17E. Cell proliferation was assessed at 72h using tritiated thymidine ([<sup>3</sup>H]-TdR) incorporation protocol. Data are the mean  $\pm$  SEM of two independent experiments, each performed in hexaplicates (\*  $P < 0.05$ ).

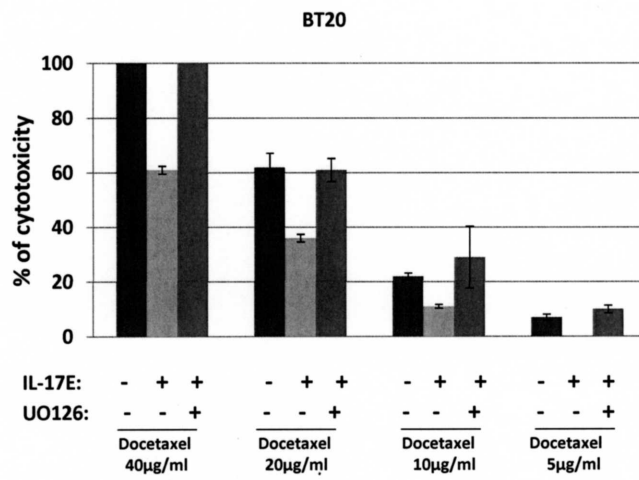

Supp Fig1: IL-17E-induced resistance to Docetaxel is dependent of ERK1/2 activation

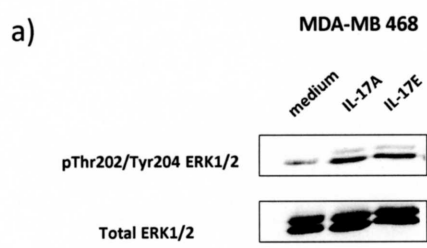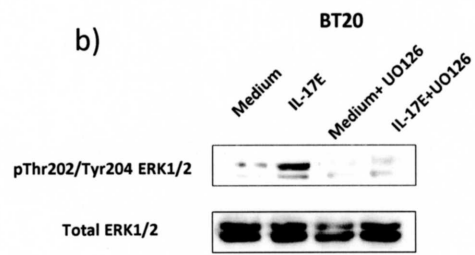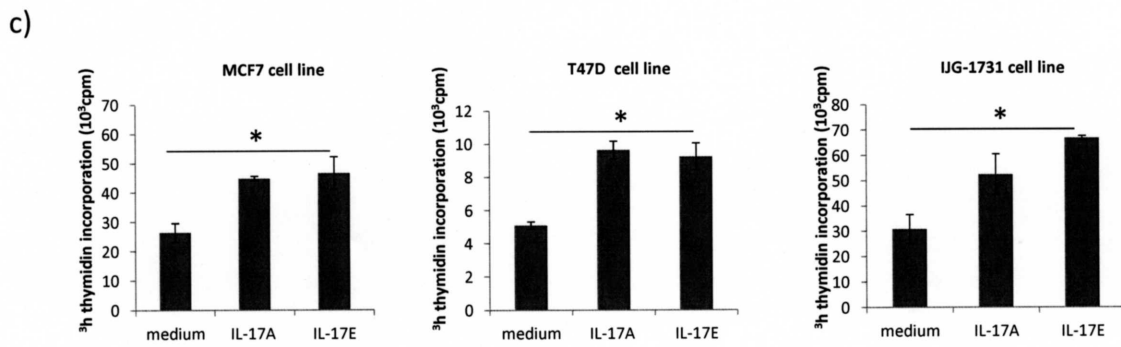

Supp Fig2: IL-17E induces the phosphorylation of ERK1/2 and cell proliferation
